# Supplementary material
Source: publisher site journal article supplement (https://static.cambridge.org/content/id/urn:cambridge.org:id:article:S1047951119001860/resource/name/S1047951119001860supp001.docx)
Supplement: Supplementary file 1 [file S1047951119001860supp001.docx]

Supplementary Information:

Genes and Transcript Identifiers for the NGS Panel: ABCC9 (NM_005691.2), ACTC1 (NM_005159.4), ACTN2 (NM_001103.2), ANKRD1(NM_014391.2), BAG3 (NM_004281.3), CASQ2 (NM_001232.2), CAV3 (NM_033337.2), CRYAB (NM_001885.1), CSRP3 (NM_003476.4), CTNNA3 (NM_013266), DES (NM_001927.3), DMD (MN_004006.2), DSC2 (NM_024422), DSG2 (NM_001943), DSP (NM_004415), DTNA (NM_032978.6), EMD (NM_000117.2), EYA4 (NM_004100.4), FHL1 (NM_001449.4), FHL2 (NM_201555.1), FKTN (NM_001079802.1), GATAD1 (NM_021167.4), GLA (NM_000169.2), JPH2 (NM_020433.4), JUP (NM_002230), KLF10 (NM_005655.2), LAMA4 (NM_002290.4), LAMP2 (NM_002294.2), LDB3 (NM_007078.2), LMNA (NM_170707), MYBPC3 (NM_000256.3), MYH6 (NM_002471.3), MYH7 (NM_000257.2), MYL2 (NM_000432.3), MYL3 (NM_000258.2), MYLK2 (NM_033118.3), MYOZ2 (NM_016599.4), NEBL (NM_006393.2), NEXN (NM_144573.3), PDLIM3 (NM_014476.5), PKP2 (NM_004572), PLN (NM_002667.3), PRKAG2 (NM_016203.3), PSEN1 (NM_000021.3), PSEN2 (NM_000447.2), RAF1 (NM_002880.3), RBM20 (NM_001134363.1), RYR2 (NM_001035.2), SCN5A (NM_198056.2), SGCD (NM_000337.5), TAZ (NM_000116.3), TCAP (NM_003673.3), TMEM43 (NM_024334), TMPO (NM_003276.2), TNNC1 (NM_003280.2), TNNI3 (NM_000363.4), TNNT2 (NM_001001430.1), TPM1 (NM_001018005.1), TTN (NM_133378.4), TTR (NM_000371.3), and VCL (NM_014000.2)
